# Supplementary material for: Relationships of Gut Microbiota Composition, Short-Chain Fatty Acids and Polyamines with the Pathological Response to Neoadjuvant Radiochemotherapy in Colorectal Cancer Patients
Source: MDPI journal article supplement (doi:10.3390/ijms22179549), 2021-09-02
Supplement: s1 [file s1]

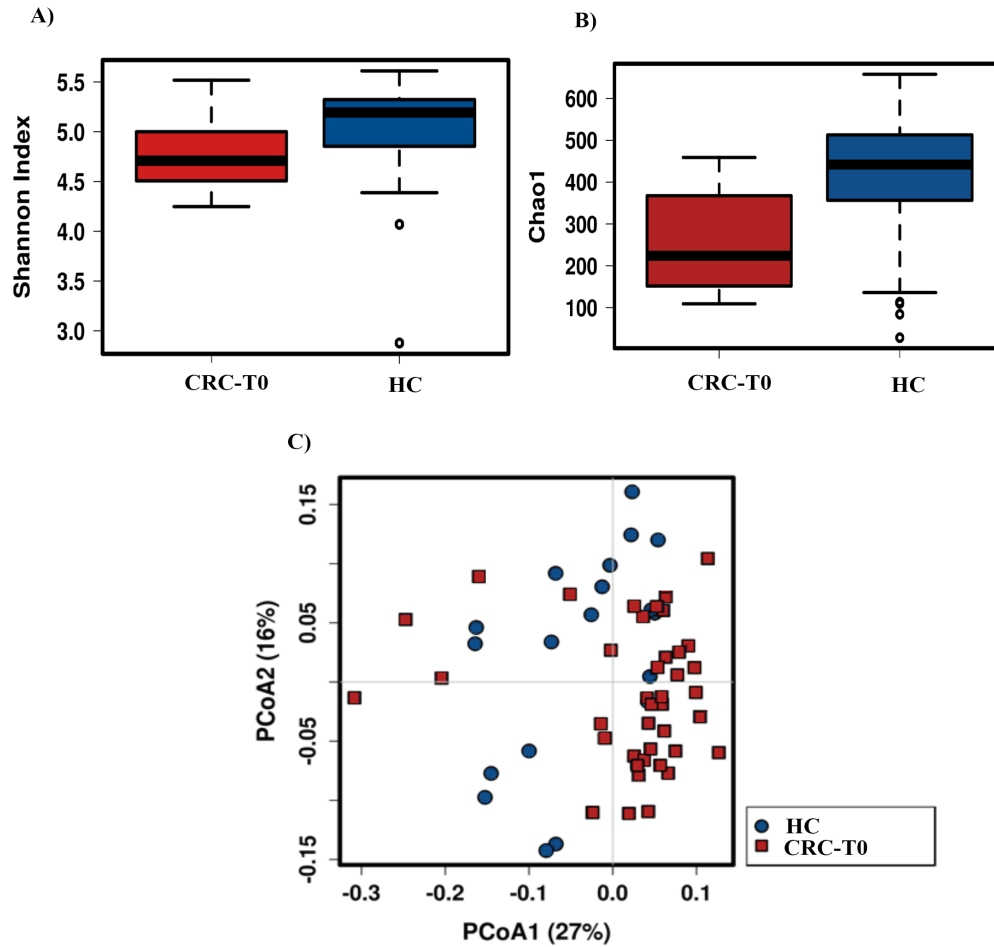

**Figure S1.** Comparison of alpha and beta diversity among CRC patients at baseline (CRC-T0) and healthy controls (HC). **(A)** Shannon index ( $p=0.026$ ); **(B)** Chao1 index ( $p=0.001$ ); **(C)** Principal component plot based on Bray-Curtis distance matrix from patients with CRC and healthy controls using Bray-Curtis dissimilarity index at genus-level ( $p=0.0001$ ). The first two coordinates are plotted with the percentage of variability explained indicated on the axis.
